# Supplementary material
Source: publisher figshare collection journal article supplement (https://gsajournals.figshare.com/ndownloader/files/22851419)
Supplement: Supplementary file 1 [file 22851419]

**Figure S1. P-value distributions for regression outlier results using different environmental variables. The q-value for the top outlier candidate is shown in parentheses for each environmental variable.**
